# Supplementary material for: Aberrant ZNF423 impedes B cell differentiation and is linked to adverse outcome of ETV6-RUNX1 negative B precursor acute lymphoblastic leukemia
Source: PubMed Central journal article supplement — J Exp Med. 2013 Oct 21;210(11):2289–304. doi: 10.1084/jem.20130497 (PMC3804944; doi:10.1084/jem.20130497), 2013-10-21
Supplement: supp_jem.20130497_JEM_20130497_sm.pdf [file supp_jem.20130497_JEM_20130497_sm.pdf]

## SUPPLEMENTAL MATERIAL

Harder et al., <http://www.jem.org/cgi/content/full/jem.20130497/DC1>

Table S1, provided as an Excel file, shows patients' clinical and pathological characteristics. qPCR-based quantification of *ZNF423*, *BMP2* and *SMAD1* mRNA levels in primary B-cell ALL. Values were normalized to *B2M* ( $2^{-\Delta C_t} * 1000$ ). C-ALL, common ALL; INF, infant; NA, data not available; BM; CNS, central nervous system; AML, acute myeloid leukemia; M, male; F, female; HR, high risk; LR, low risk; S, standard; R, reduced; I, intensified. Number code for cause of death: 1, death from relapsing disease; 2, treatment related mortality; 3, death in induction; 4, treatment related mortality in relapse; 5, second malignancy; 6, treatment related mortality after HSCT.

**Table S2.** Sequence of oligonucleotides for qPCR and mutagenesis of CGI sequence. Fw: forward primer, rev: reverse primer.

| Primer for qPCR Gene (GenBank Number) | Sequence 5'-3'                                                                            |
|---------------------------------------|-------------------------------------------------------------------------------------------|
| <i>B2M</i> (NM_004048)                | fw: TTC TGG CCT GGA GGC TATC<br>rev: TCA GGA AAT TTG ACT TTC CAT TC                       |
| <i>ZNF423</i> (NM_015069.2)           | fw: GCA GAC CTG ACG GAC CAC<br>rev: AGG CCA CCC AGG AGA GTT                               |
| <i>ZNF423α</i> (NM_015069.2)          | fw: GAA GAA AGA CAT GGA TGC ATA AGA AGA GGG<br>rev: TCG CAC TCT GGC TCT CCT TCT AG (SP1b) |
| <i>ZNF423β</i>                        | fw: ATG TCC AGG CGG AAG CAG GCG A<br>rev: TCG CAC TCT GGC TCT CCT TCT AG (SP1b)           |
| <i>BMP2</i> (NM_001200)               | fw: TCA AGC CAA ACA CAA ACA GC<br>rev: AGC CAC AAT CCA GTC ATT CC                         |
| <i>EBF-1</i> (NM_024007)              | fw: AGC TGC CAA CTC CCC CTA T<br>rev: GGG AGG CTT GTG GAG GAG                             |
| <i>SMAD1</i> (NM_005900)              | fw: TGT GTA CTA TAC GTA TGA GCT TTG TGA<br>rev: TAA CAT CCT GGC GGT GGT A                 |
| <i>CD79a</i> (NM_001783)              | fw: CAA GAA CCG AAT CAT CAC AGC<br>rev: CGT TCT GCC ATC GTT TCC                           |
| <i>CD79b</i> (NM_000626)              | fw: TTG CTG CTG CTG CTC TCA<br>rev: cgc gaa caa gca cta cct tt                            |
| <i>IGLL1</i> (NM_020070)              | fw: TGG TGT GTC TCA TGA ATG ACT TT<br>rev: GGT GAT GGG GGT ACC ATC T                      |
| <i>CD19</i> (NM_007128)               | fw: TCC ACC TGG AGA TCA CTG CT<br>rev: GAC CTT CCA GCC ACC AGT C                          |
| <i>RUNX2</i> (NM_004348)              | fw: ACC GAT GTG CCT AGG CGC ATT TCA<br>REV: GAA AAA GGG CCC AGT TCT GAA GCA c             |
| <i>ZNF521</i> (NM_015461)             | fw: TGG GAT ATT CAG GTT CAT GTT G<br>rev: ACT GGA GTT TGG CAG GAG AG                      |
| Primer for mutagenesis                |                                                                                           |
| pCpGL-CGI_del102_α-promoter           | fw: GTC CCG GGG CAG CCC CCG CGG<br>rev: CCG CGG GGG CTG CCC CGG GAC                       |
| pCpGL-CGI_del183_α-promoter           | fw: CGG GTA GCT GGG AGG GAA GAA CCC C<br>rev: GGG GCT CTT CCC TCC CAG CTA CCC G           |
| pCpGL-CGI_del220_α-promoter           | fw: CCC CTG ATT TTC CCA GCC TCT TCC CAG CC<br>rev: GGC TGG GAA GAG GCT GGG AAA ATC AGG GG |
| pCpGL-CGI_del250_α-promoter           | fw: CCC CTC TTC CCA GCC TCC TCC CC<br>rev: GGG GAG GAG GCT GGG AAG AGG GG                 |
